# Supplementary material for: Au nanoparticle sensitized blue TiO2 nanorod arrays for efficient Gatifloxacin photodegradation
Source: Royal Society of Chemistry journal article supplement (doi:10.1039/d3ra05552c), 2023-01-01
Supplement: d3ra05552c1.pdf [file d3ra05552c1.pdf]

1 **Supplementary Material**

2

3 **Au nanoparticles sensitized blue TiO<sub>2</sub> nanorod arrays for efficient**

4 **Gatifloxacin photodegradation**

5 Jun Guo<sup>a,b</sup>, Wei Gan<sup>b</sup>, Ruixin Chen<sup>b</sup>, Miao Zhang<sup>\*b</sup>, and Zhaoqi Sun<sup>\*b</sup>

6

7

8

9

10

11

12

13

14

15

16

17

18

19

20

---

<sup>a</sup>. School of Electronic Engineering, Huainan Normal University, Huainan, 232038, PR China.

<sup>b</sup>. School of Materials Science and Engineering, Anhui University, Hefei, 230601, PR China. zhmiao@ahu.edu.cn (M. Zhang), szq@ahu.edu.cn (Z. Sun).

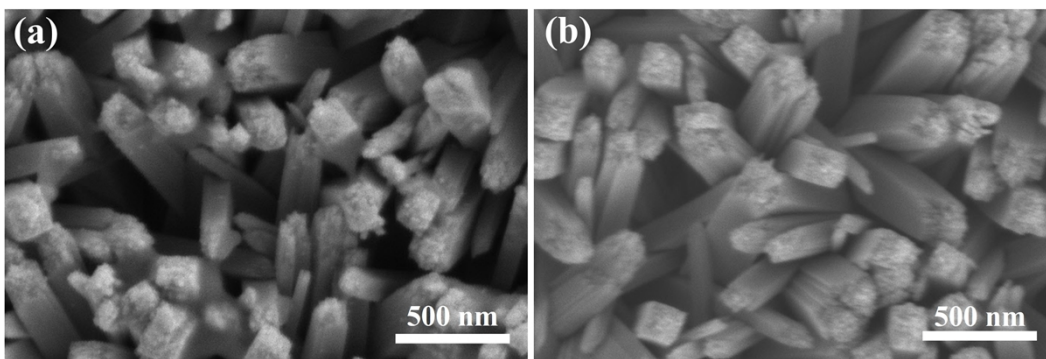

1

2

3

Fig. S1. SEM images of TiO<sub>2</sub> (a) and B-TiO<sub>2</sub> (b).

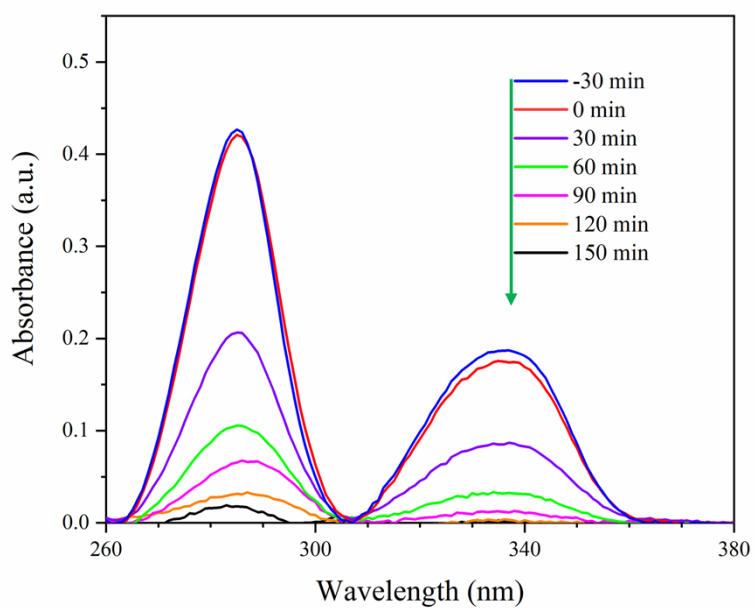

4

5

6

7

8

Fig. S2. UV-vis spectra of Gatifloxacin by Au/B-TiO<sub>2</sub>-2 at various time.

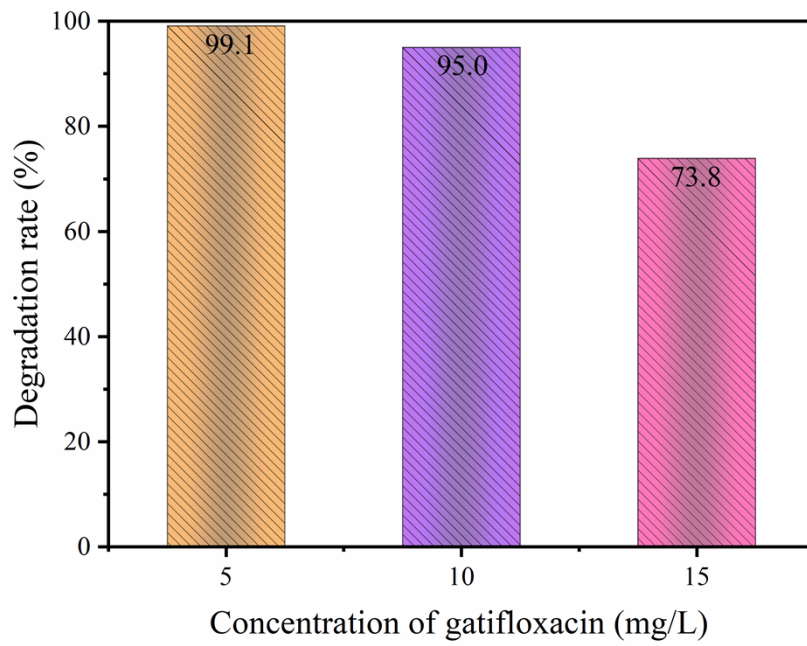

1  
2  
3  
4

Fig. S3. Comparison of removal rates of Gatifloxacin at different concentrations by Au/B-TiO<sub>2</sub>-2.

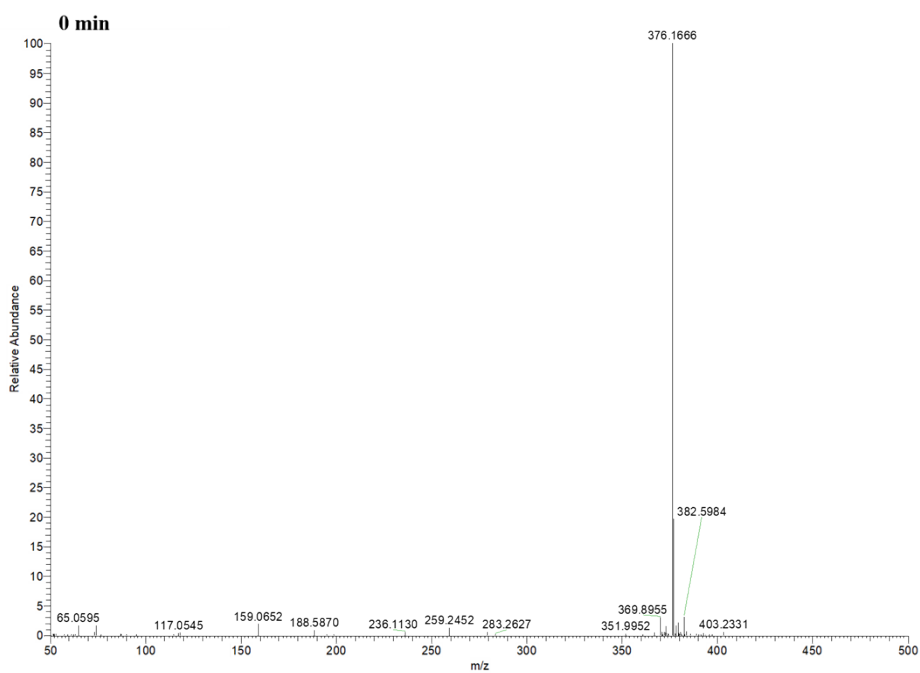

5  
6  
7  
8

Fig. S4. MS spectra of Gatifloxacin at 0 min over Au/B-TiO<sub>2</sub>-2.

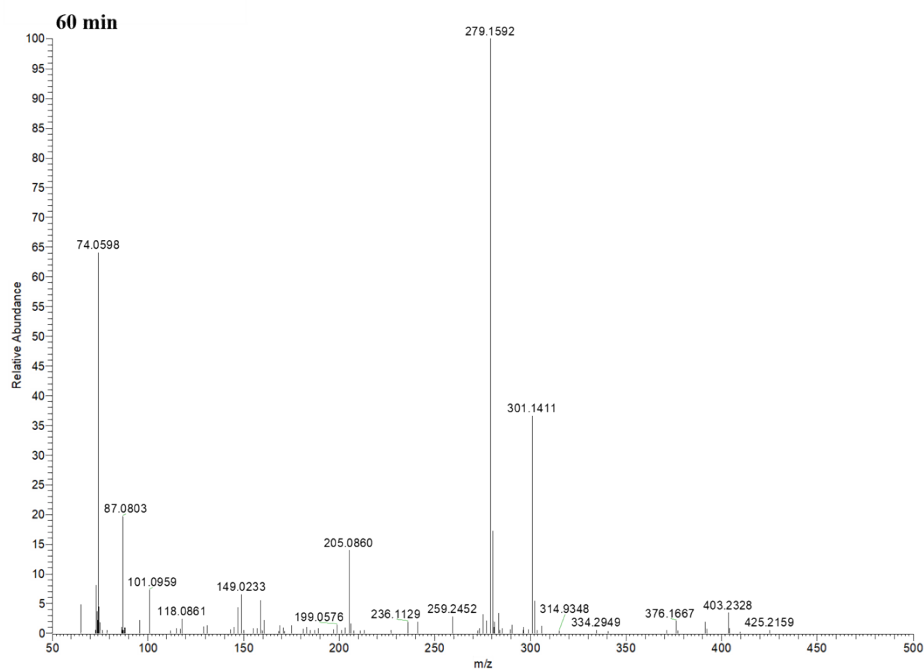

1

2

**Fig. S5.** MS spectra of Gatifloxacin at 60 min over Au/B-TiO<sub>2</sub>-2.

3

4

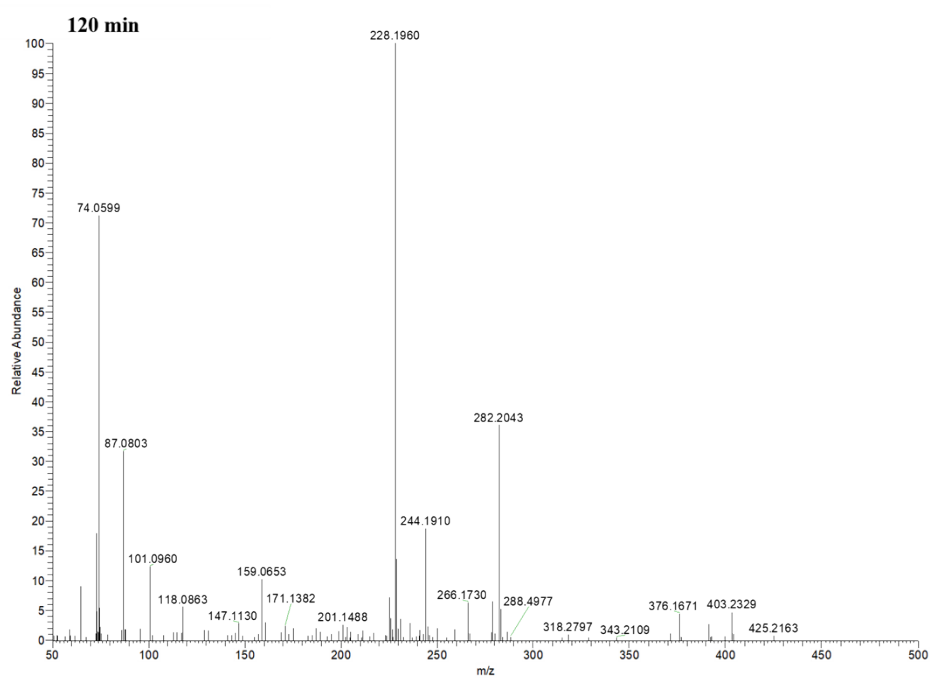

5

6

**Fig. S6.** MS spectra of Gatifloxacin at 120 min over Au/B-TiO<sub>2</sub>-2.

7

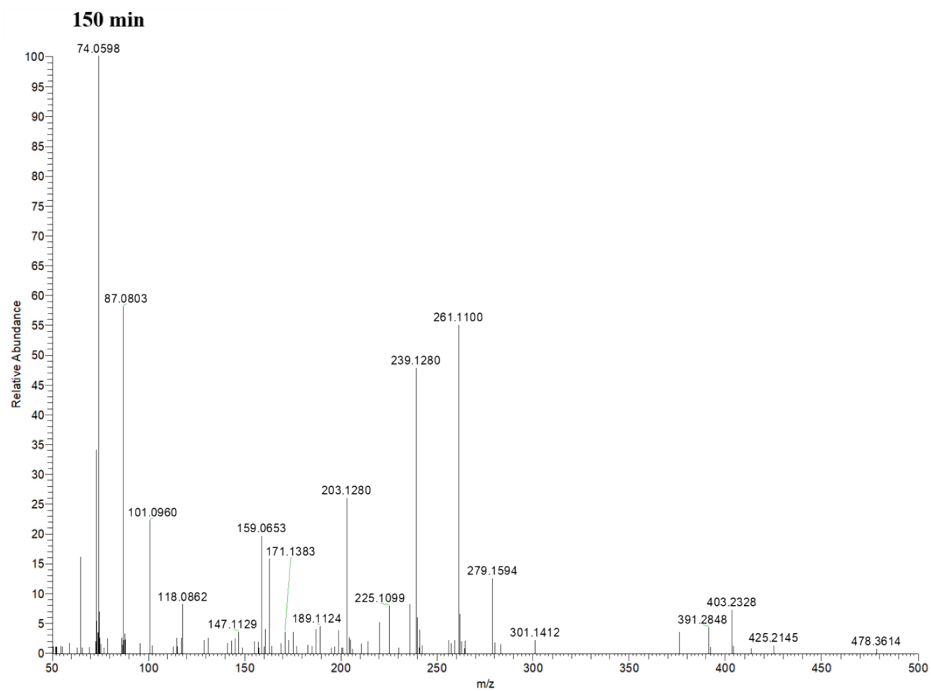

Fig. S7. MS spectra of Gatifloxacin at 150 min over Au/B-TiO<sub>2</sub>-2.

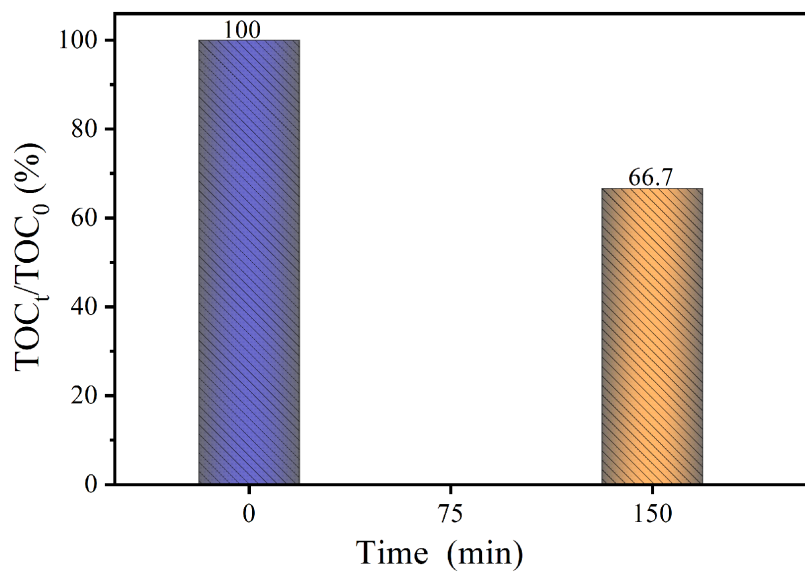

Fig. S8. Mineralization of Gatifloxacin by Au/B-TiO<sub>2</sub>-2.

1  
2  
3  
4  
5  
6  
7  
8  
9  
10

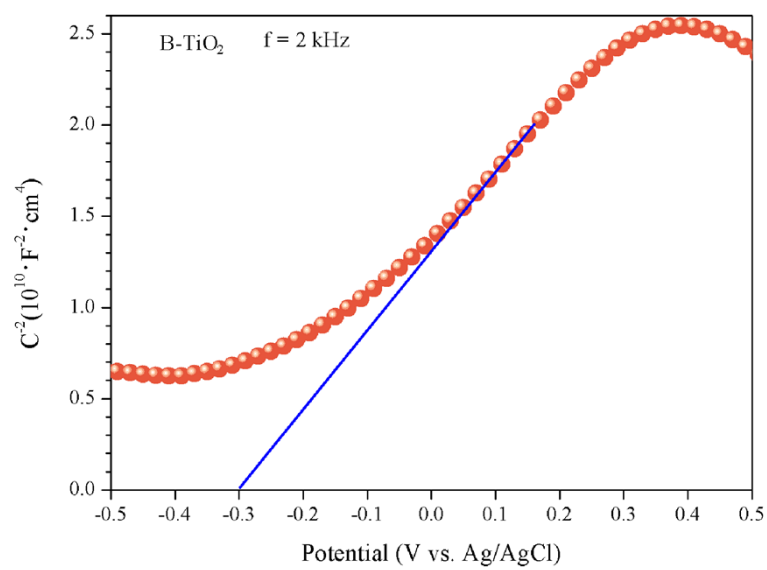

1

2

**Fig. S9.** Mott-Schottky plots of B-TiO<sub>2</sub>.
